# Supplementary material
Source: Springer Nature journal article supplement (https://www.springermedizin.de/resource/supplementary/12985_2009_776_MOESM1_ESM.pdf/9609040)

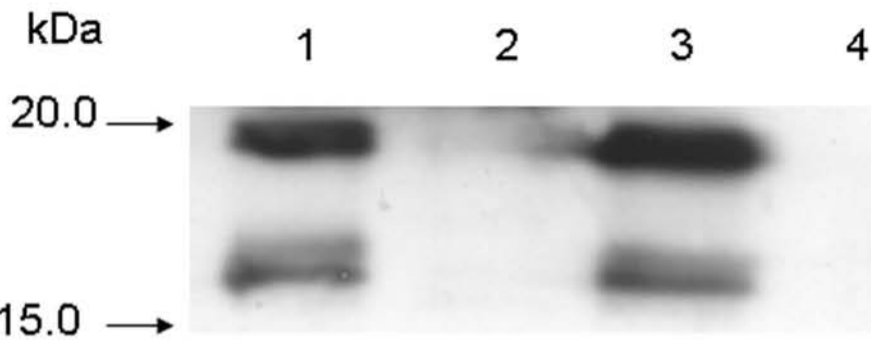

pcDNA/Ap<sub>4</sub>A-V5-HisA

pXJ3'-ORF7a-HA

+

-

+

+

+

+

+

+

Supplement: MOESM1 [file 9609040]
